# Supplementary material for: Factors affecting template switch recombination associated with restarted DNA replication
Source: eLife journal article supplement (doi:10.7554/elife.41697), 2019-01-22
Supplement: supp [file elife-41697-supp-v1.zip]

Archive with 9 entries (9 files):
- elife_poa_e41697_Figure_2_figure_supplement_1.tif
- elife_poa_e41697_Figure_4_figure_supplement_1.tif
- elife_poa_e41697_Transparent_Reporting_File.pdf
- elife_poa_e41697_Figure_6_figure_supplement_1.tif
- elife_poa_e41697_Figure_6_figure_supplement_2.tif
- elife_poa_e41697_Supplementary_File_1.docx
- elife_poa_e41697_Figure_1_figure_supplement_1.tif
- elife_poa_e41697_Supplementary_File_2.docx
- elife_poa_e41697_Supplementary_File_3.docx
