# Supplementary figures and images for: Factors affecting template switch recombination associated with restarted DNA replication
Source: eLife journal article supplement (doi:10.7554/elife.41697), 2019-01-22

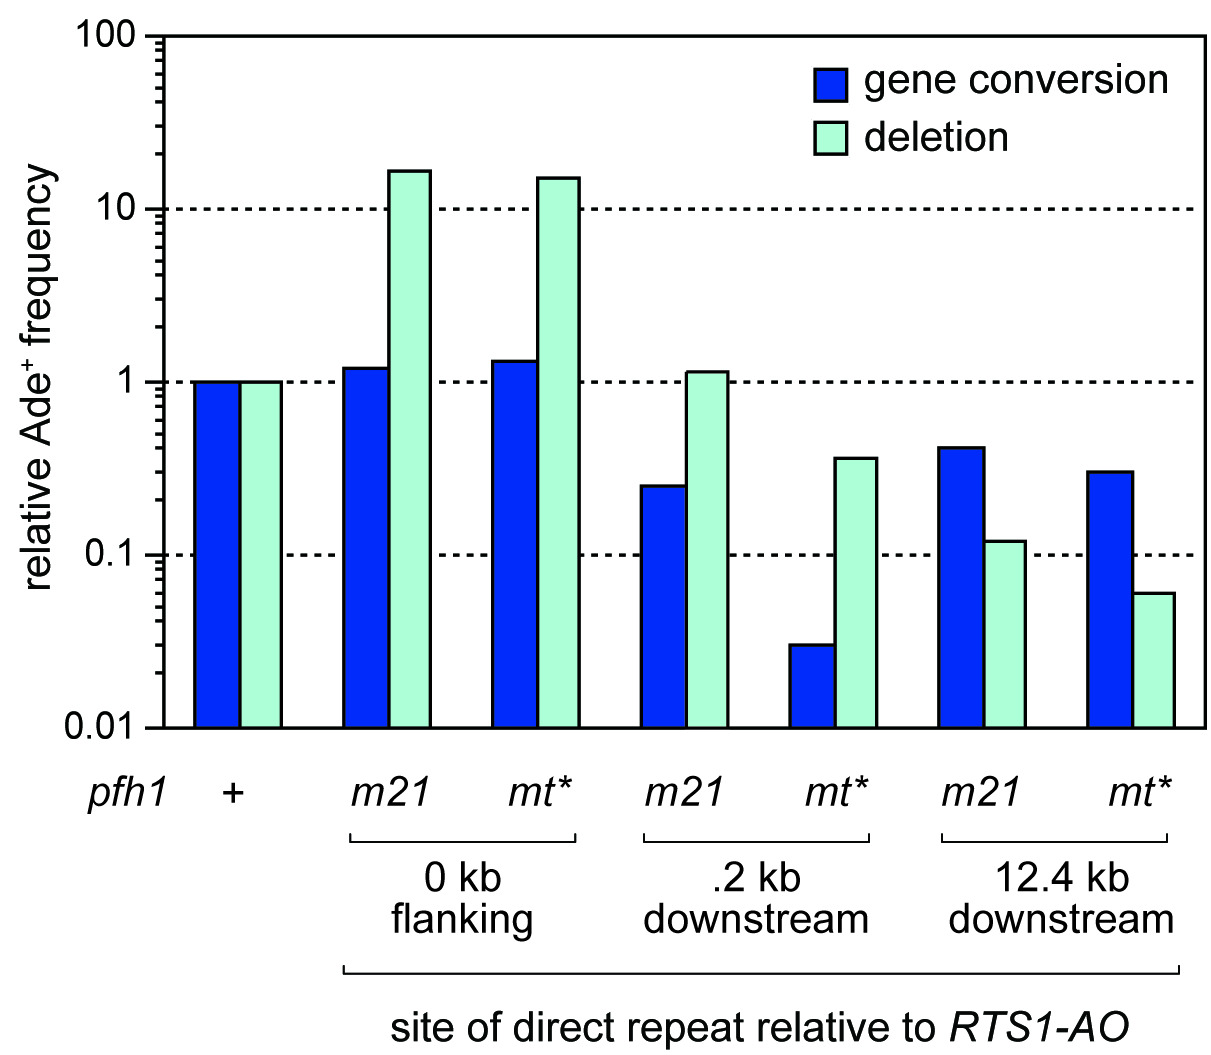

Supplement: supp [file elife-41697-supp-v1.zip › elife_poa_e41697_Figure_2_figure_supplement_1.tif]

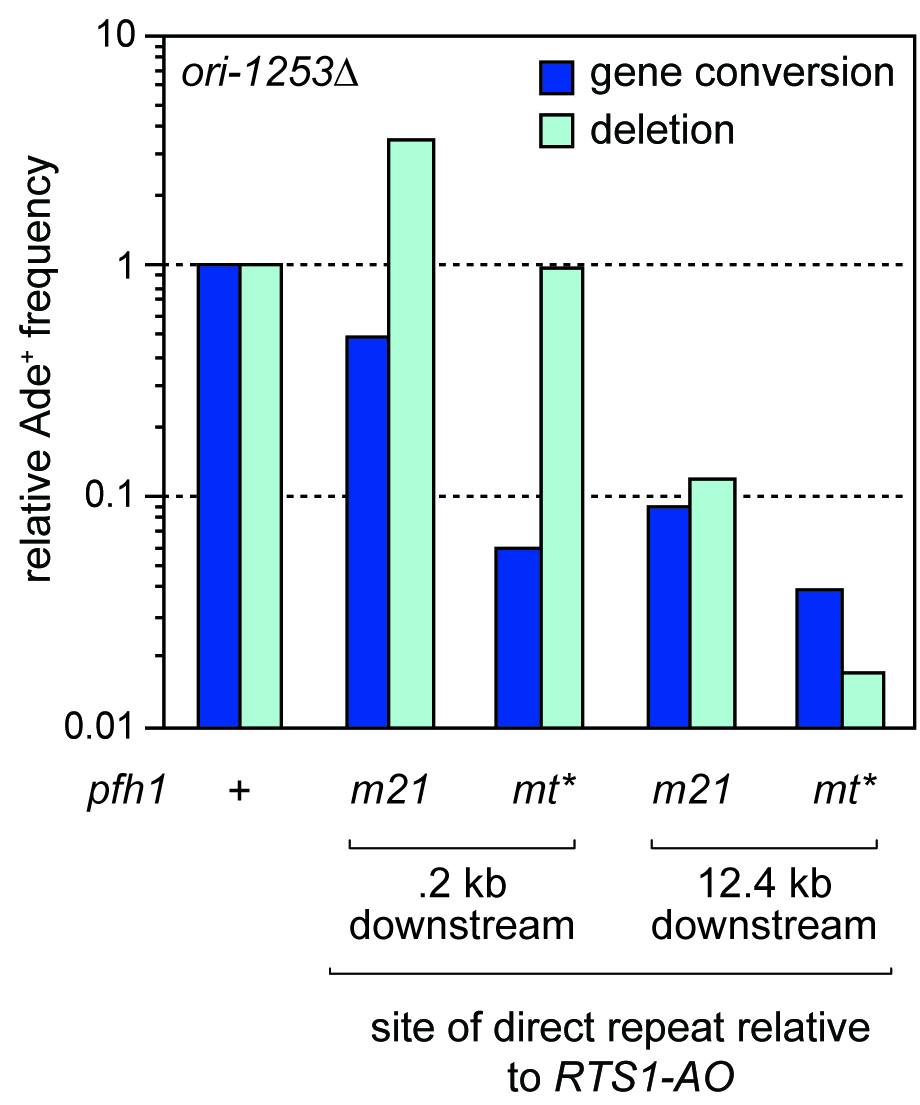

Supplement: supp [file elife-41697-supp-v1.zip › elife_poa_e41697_Figure_4_figure_supplement_1.tif]

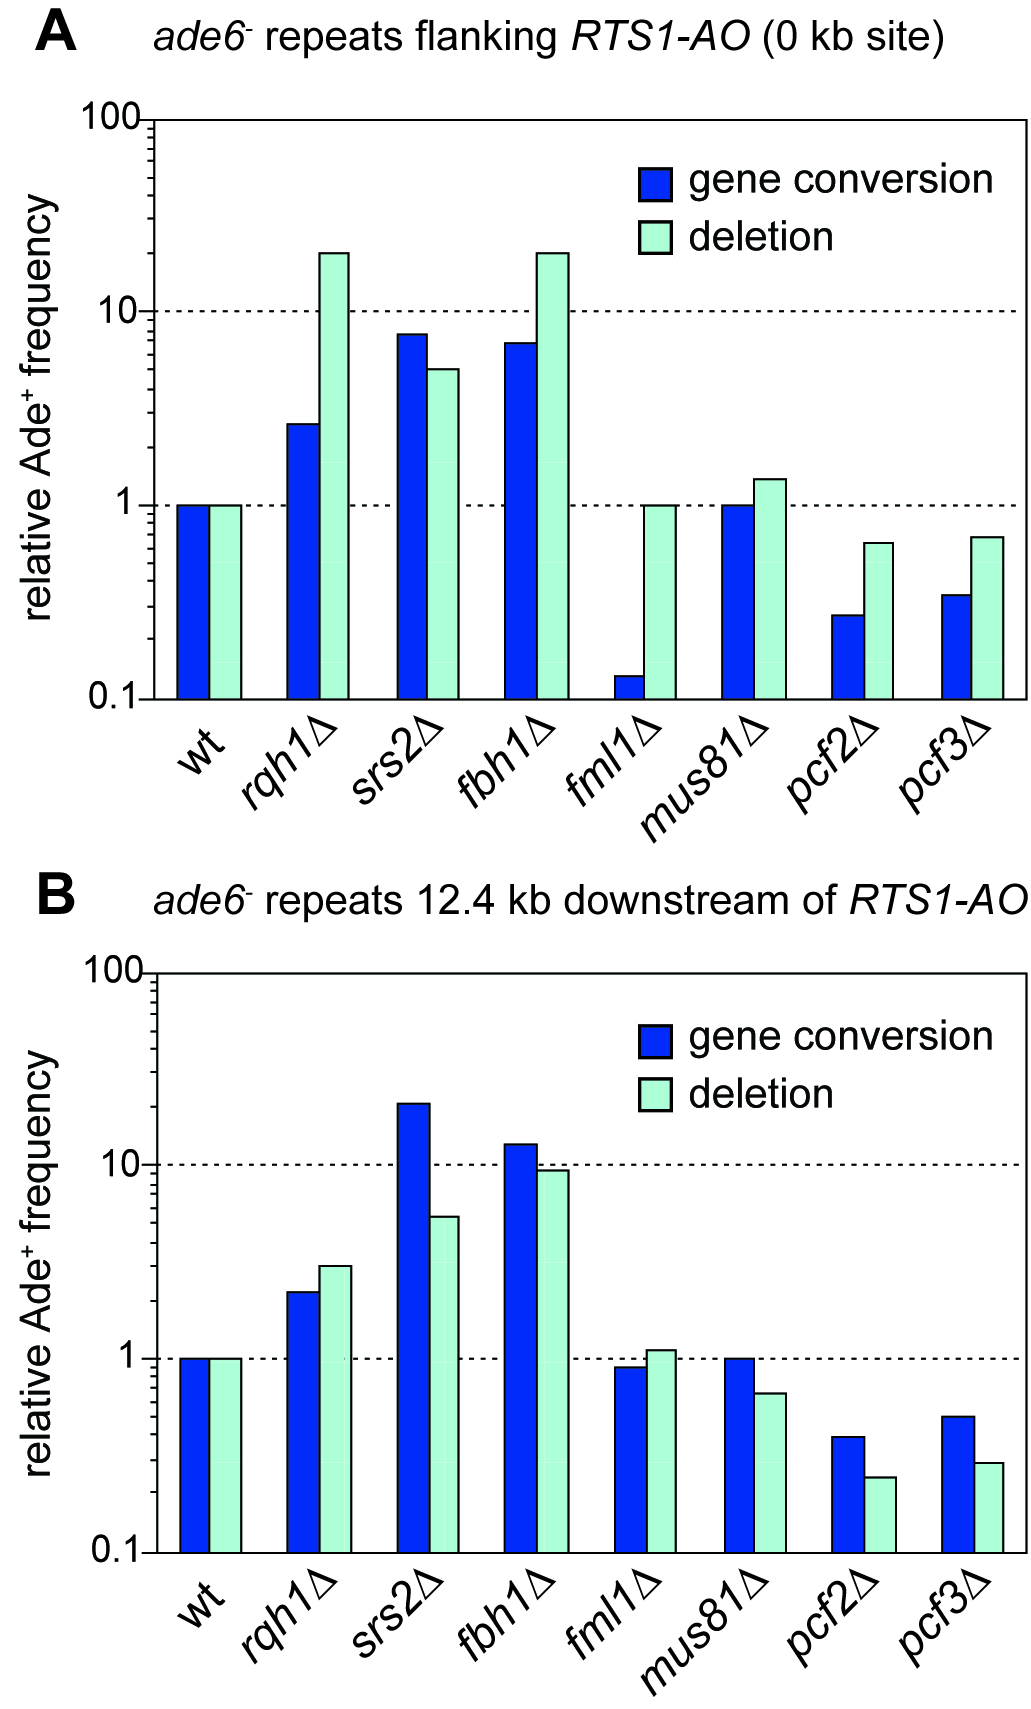

Supplement: supp [file elife-41697-supp-v1.zip › elife_poa_e41697_Figure_6_figure_supplement_1.tif]

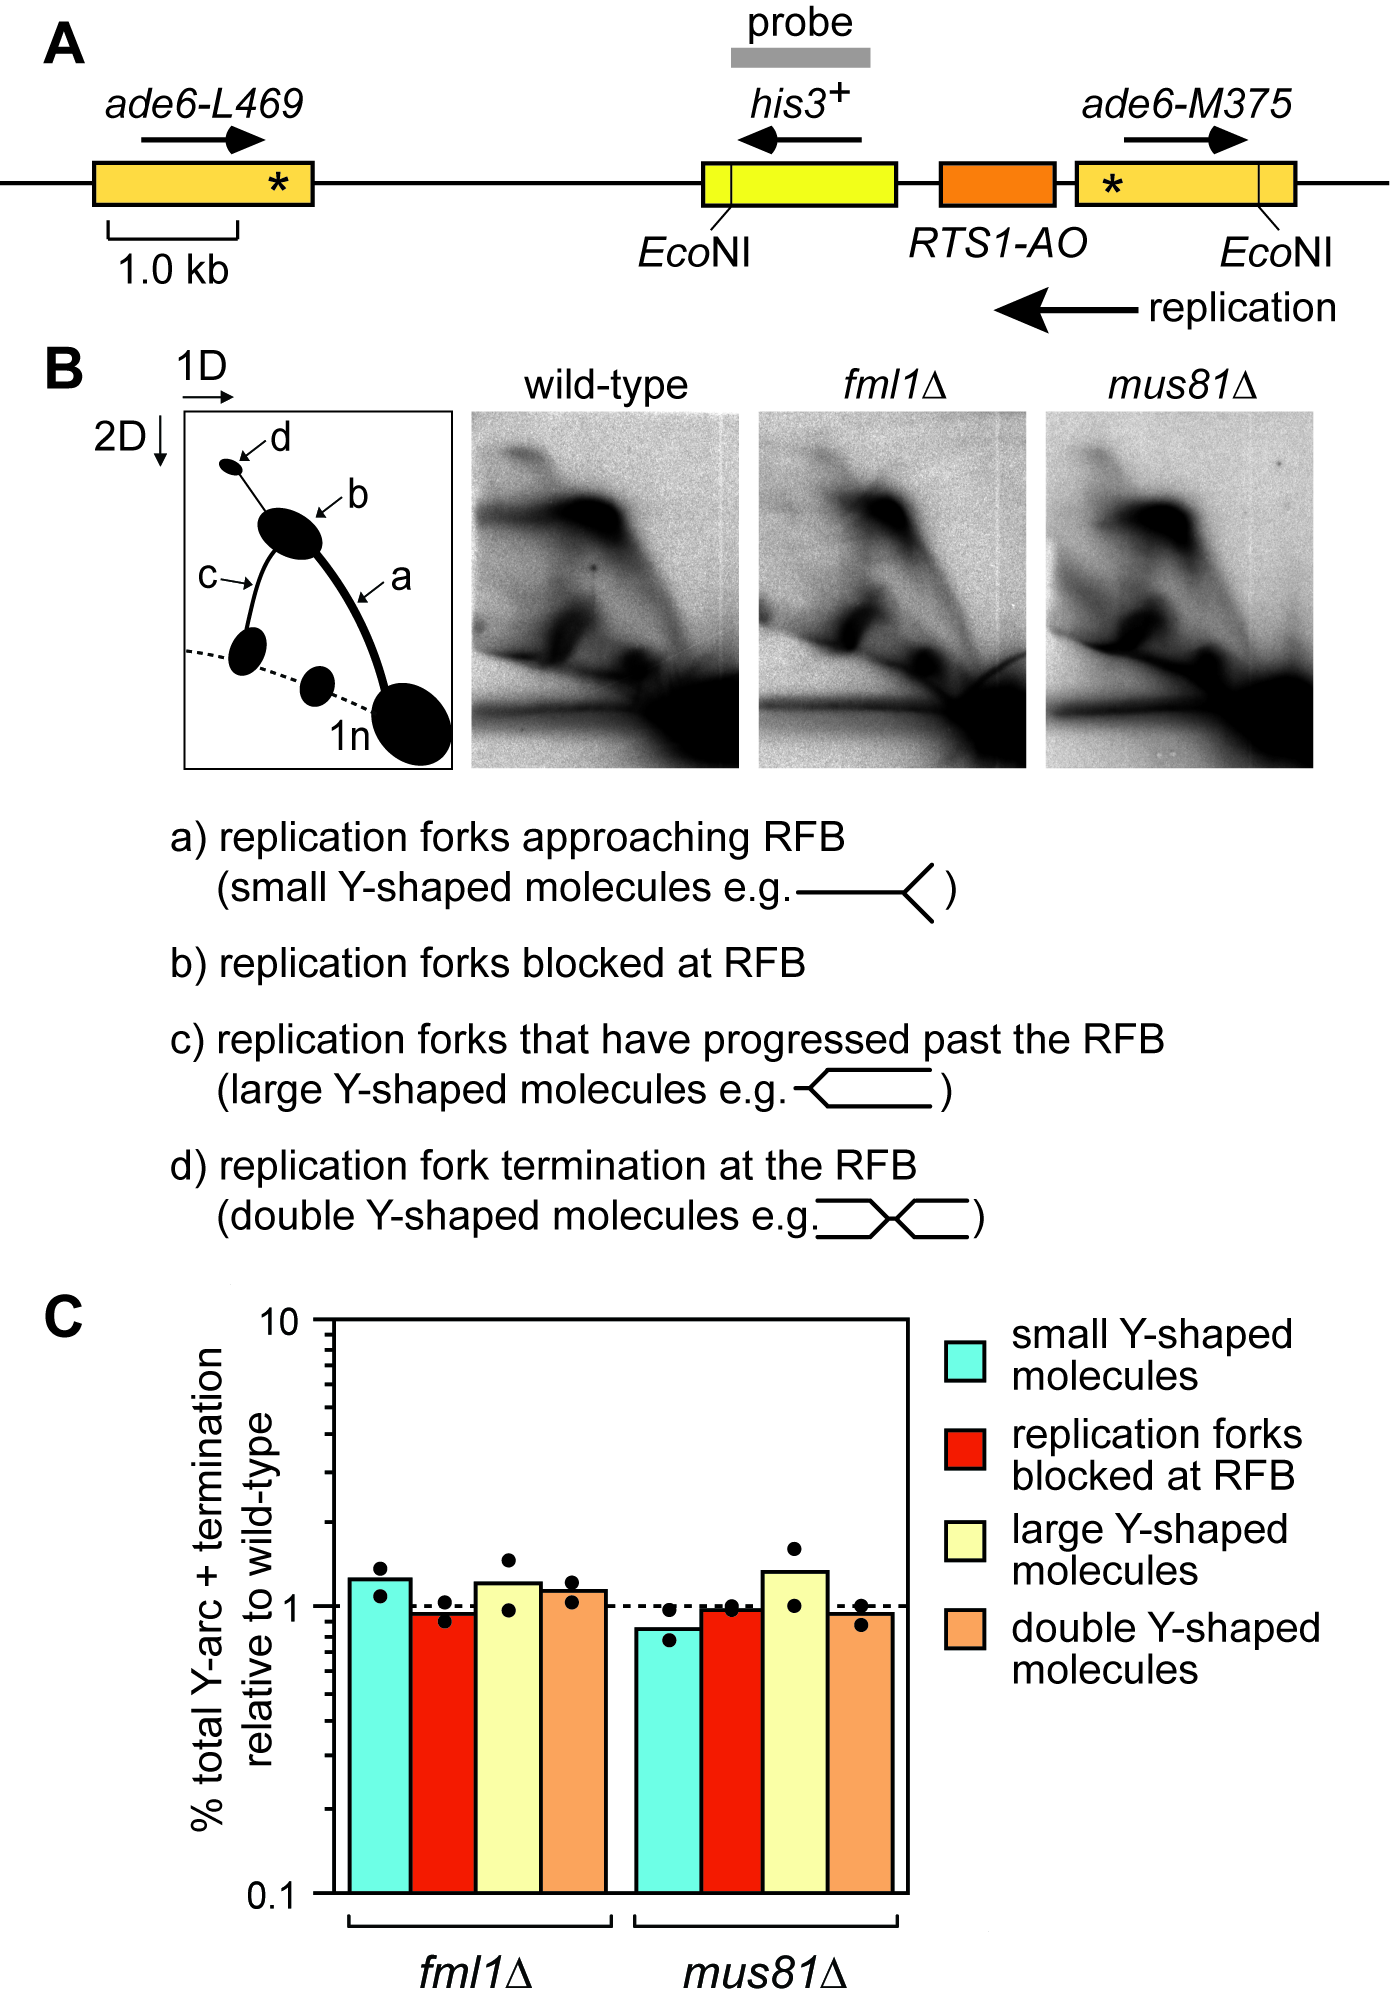

Supplement: supp [file elife-41697-supp-v1.zip › elife_poa_e41697_Figure_6_figure_supplement_2.tif]

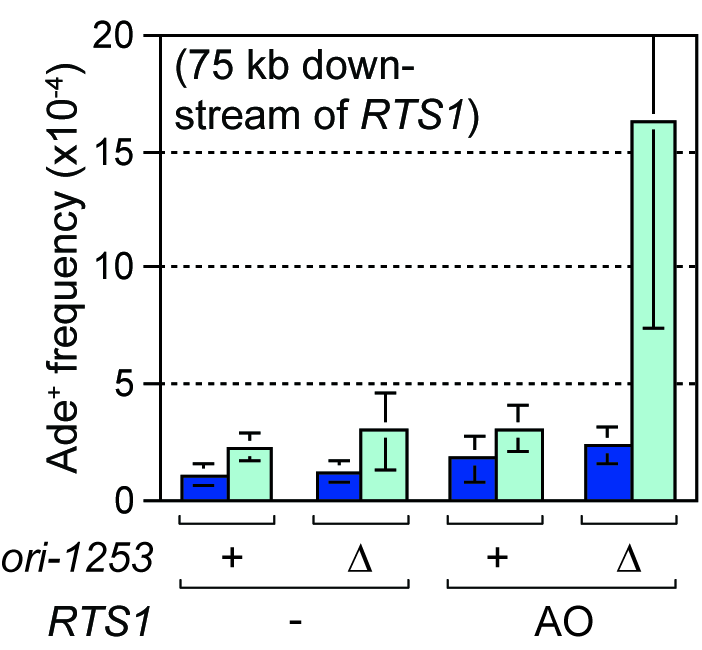

Supplement: supp [file elife-41697-supp-v1.zip › elife_poa_e41697_Figure_1_figure_supplement_1.tif]
